# Supplementary material
Source: PubMed Central journal article supplement (PMC2575282)
Supplement: 0712239105_0712239105SI.pdf [file 0712239105_0712239105SI.pdf]

# Supporting Information

Kawatani *et al.* 10.1073/pnas.0712239105

## SI Methods

**Reagents and Proteins.** The following were used: naphthol AS-MX phosphate, fast red violet LB salt, toluidine blue O, GGOH, mevastatin, Alizarin red-S, butylated hydroxytoluene, FPP, and *Saccharomyces cerevisiae* GLO1 (Sigma-Aldrich); Isogen (Nippon Gene); 4-[<sup>14</sup>C]-IPP and Tri-Carb 2900TR (Perkin-Elmer); alendronate (Calbiochem); rhodamine-conjugated phalloidin (Molecular Probes); calcitonin (Elicitonin, Asahi Kasei); SuperScript II (Invitrogen); Ex TaqDNA polymerase (Takara); and anti-Rap1A, anti-Rap1, and anti-NFATc1 Abs (Santa Cruz Biotechnology).

**Chemical Characterization of M-GFN.** GFN was purified as described (1, 2). TMS-diazomethane (2 M, 0.345 ml) was added to a solution of GFN (100 mg, 0.34 mmol) in methylene chloride (3 ml) and methanol (1 ml), and the mixture was sequentially stirred for 30 min at 0°C. The reaction mixture was extracted with ethyl acetate and washed with brine. The resultant extracts were further purified with reverse-phase HPLC (Capcell Pak C<sub>18</sub>, Shiseido Co., Ltd.; acetonitrile-0.5% phosphoric acid (70:30), 10 ml/min) to yield M-GFN as a brown powder (*t<sub>R</sub>* 11.4 min), mp: 140–141°C; TLC (hexane:ethyl acetate, 2:1 vol/vol): *R<sub>f</sub>* = 0.29; <sup>1</sup>H-NMR (300 MHz, DMSO-*d*<sub>6</sub>): δ10.23 (s, 1H), 9.28 (s, 1H), 8.41 (s, 1H), 6.48 (d, *J* = 1.4 Hz, 1H), 6.26 (d, *J* = 2.2 Hz, 1H), 6.26 (d, *J* = 1.4 Hz, 1H), 6.10 (d, *J* = 2.2 Hz, 1H), 3.77 (s, 3H), 2.20 (s, 3H), 2.12 (s, 3H); <sup>13</sup>C-NMR (75 MHz, DMSO-*d*<sub>6</sub>): δ169.0, 160.4, 158.3, 146.9, 142.1, 139.1, 135.3, 127.9, 113.2, 113.0, 112.7, 109.4, 100.6, 51.8, 20.7, 20.4; IR (KBr): 3430, 2944, 1654, 1604, 1581, 1513, 1454, 1421, 1355, 1322, 1297, 1263, 1207, 1151, 1108, 1064, 1039, 997, 954 cm<sup>-1</sup>; UV/Vis: λ<sub>max</sub> 214.0, 262.0, 302 nm; HREIMS (m/z): [M]<sup>+</sup> calcd. for C<sub>16</sub>H<sub>16</sub>O<sub>2</sub>, 304.0947; found, 304.0964.

**TRAP Staining.** Cells were fixed in 3.7% formalin at room temperature for more than 30 min and treated with acetone/ethanol (1:1 vol/vol) at room temperature for 1 min, after which the cell surface was air dried. The fixed cells were incubated with 0.01% naphthol AS-MX phosphate and 0.05% fast red violet LB salt in the presence of 50 mM sodium tartrate and 90 mM sodium acetate (pH 5.0) for TRAP staining, and were then rinsed with water.

**Drug Screening.** In the screening with our chemical library, compounds were added to BMMs for 72 h in the presence of RANKL and M-CSF, and then TRAP<sup>+</sup> MNCs were counted, as inhibition of osteoclastogenesis. Also, compounds were added to osteoclasts for 48 h in the presence of RANKL and M-CSF as inhibition of osteoclast survival.

**Phagocytosis Assay.** Cells were treated with FL-zymosan A BioParticles (50 μg/ml) for 1.5 h. The cells were then rinsed with PBS twice to remove the particles that were not incorporated into the cells, and fixed in 3.7% formalin. A fluorescence microscope was used to observe the FL-zymosan A BioParticles in the cells.

**Pit Formation Assay.** BMMs were cultured on dentine slices (4 mm in diameter, 0.2 mm in thickness) in 96-well culture plates with RANKL (50 ng/ml) and M-CSF (50 ng/ml) for 72 h. After wiping the cells off dentine slices with cotton, the slices were immersed in 1% toluidine blue O to stain resorption pits formed by mature osteoclasts.

**Preparation of M-GFN Beads.** M-GFN beads were prepared as follows: photoaffinity linker-coated agarose beads (100 μl) (3) were washed with distilled water (3 × 400 μl) on a spin column and transferred to a glass sample vial. The transferred beads were suspended in 2-propanol (200 μl). Residual water absorbed on the beads was removed azeotropically using a rotary evaporator, and the beads were dried *in vacuo*. A solution of M-GFN (1 mg/150 μl in methanol) or methanol (as control beads) was added to the dried beads, and the mixture was concentrated and dried *in vacuo*. The beads were irradiated at 365 nm (4 J cm<sup>-2</sup>) by a UV crosslinker, and the resulting beads were washed successively with 50% aq. methanol, methanol, DMSO, and methanol (3 × 400 μl each), suspended in PBS (200 μl).

**RNAi and RT-PCR.** *GLO1* and *SCP2* siRNA duplexes were designed from the mouse *GLO1* and *SCP2* cDNA sequences (Nippon EGT) with the following sequences: *GLO1* #1, 5'-AGAAGUC-CCUGGAUUUUUAdTdT-3'; *GLO1* #2, 5'-GCAUGG-ACGUUUUCCAGAAAdTdT-3'; *SCP2* #1, 5'-ACAUGG-GACUGGCCAUGAAdTdT-3'; *SCP2* #2, 5'-GAAAAUCG-GUGGCAUUUUUdTdT-3'. An siRNA duplex designed to target GFP (5'-GAACGGCATCAAGGTGAACdTdT-3') was used as a control. The *SCP2* gene has two initiation sites coding for proteins that share a common 13-kDa SCP2 C terminus. One site codes for 58-kDa SCP-x, which is partially posttranslationally cleaved to 13-kDa SCP2 and a 45-kDa protein (peroxisomal 3-ketoacyl-CoA thiolase). A second site codes for 15-kDa pro-SCP2, which is completely posttranslationally cleaved to 13-kDa SCP2 (4). Therefore, SCP2 siRNAs will induce the knockdown of not only SCP2 but also of SCP-x and peroxisomal 3-ketoacyl-CoA thiolase. BMMs were transfected with siRNAs using Lipofectamine RNAiMAX according to the manufacturer's instructions (Invitrogen). *GLO1* and *SCP2* knockdowns after 48-h siRNA treatment were measured by RT-PCR. Total RNA from the cells was prepared using Isogen. First-strand cDNA was synthesized for PCR using SuperScript II and subjected to amplification with Ex TaqDNA polymerase using the following specific primers: *GLO1*, 5'-CAGTGGCCTCACTGATGAGA-3' (forward) and 5'-CGTCATCAGGCTTCTTCAACA-3' (reverse); *SCP2*, 5'-TCAAGGCAAACCTCGTCTTT-3' (forward) and 5'-CAGTCCCATGTTACCAGCAA-3' (reverse); *GAPDH*, 5'-AACTTTGGCATTGTGGAAGG-3' (forward) and 5'-CCCTGTTGTAGCCGTAT-3' (reverse). The bands were quantitated by scanning the agarose gels with Typhoon 9400 Variable Mode Imager in conjunction with ImageQuant TL Image Analysis Software (GE Healthcare).

**Actin Staining.** Osteoclasts cultured on dentine slices were fixed in 3.7% formalin diluted with PBS and rinsed for 1 min with PBS containing 0.1% Triton X-100. F-actin was labeled with rhodamine-conjugated phalloidin by incubating for 30 min in the dark. The cells on dentine slices were washed with PBS and actin rings were visualized using fluorescence microscope.

**In Vitro GGPP Synthase Assay.** Kinetic analysis of M-GFN against GGPP synthase was performed as previously described (1) with a slight modification. The reaction mixture was in a final volume of 0.4 ml containing 0.1 M Tris-HCl (pH 7.5), 0.3 mM MnCl<sub>2</sub>, 0.2 mM MgCl<sub>2</sub>, 10 μg/ml butylated hydroxytoluene, 1.02–4.06 nCi/ml 4-[<sup>14</sup>C]-IPP, 55.3–221.0 nM FPP, and 0.013 μg recombinant human GST-GGPP synthase. The reaction was initiated by the addition of IPP and FPP, and was terminated by the addition

of 0.6 ml of 1-BuOH after 45 min at 37°C. Enzyme activity was evaluated for the radioactivity of 1-BuOH extract using Tri-Carb 2900TR.

**Measurement of Intracellular MG.** BMMs were treated with M-GFN or MG for 24 h. Cells were harvested, washed twice with PBS, equalized for cell number for each sample ( $2 \times 10^7$  cells), and then resuspended in distilled water. Cells were boiled for 5 min and centrifuged at  $15,000 \times g$  for 15 min at 4°C, and the supernatants were used as the source of MG. MG concentration was measured enzymatically using *Saccharomyces cerevisiae* GLO1 (5). The reaction was initiated by adding 5 nM GLO1 to the reaction buffer (100 mM sodium phosphate pH 7.0, 1 mM GSH, and 14.6 mM  $\text{MgSO}_4$ ) contained in each supernatant.

**In Vitro Mineralization of Osteoblastic Cells.** Mouse stromal/osteoblastic cell line UAMS-32 (kindly provided C.A. O'Brien, University of Arkansas) was cultured in differentiation medium ( $\alpha$ -MEM containing 10% FCS, 50  $\mu\text{g/ml}$  ascorbic acid, and 10 mM  $\beta$ -glycerophosphate) for 12 days in the absence or presence of various concentrations of M-GFN. The medium was changed every 3 days. Then, cells were washed with PBS, fixed in 70% ethanol for 30 min, stained with 40 mM Alizarin red-S (AR-S) (pH 4.2) for 10 min, and extensively rinsed with water. After photography, the bound staining was eluted with 10% cetylpyridinium chloride in 10 mM sodium phosphate (pH 7.0), and the AR-S concentration was determined by absorbance measurement at 600 nm using an AR-S standard curve in the same solution.

1. Zenitani S, et al. (2003) Gerfelin, a novel inhibitor of geranylgeranyl diphosphate synthase from *Beauveria felina* QN22047 I Taxonomy, fermentation, isolation, and biological activities. *J Antibiot* 56:617–621.
2. Zenitani S, et al. (2003) Gerfelin, a novel inhibitor of geranylgeranyl diphosphate synthase from *Beauveria felina* QN22047 II Structural elucidation. *J Antibiot* 56:658–660.
3. Kanoh N, Honda K, Simizu S, Muroi M, Osada H (2005) Photo-cross-linked small-molecule affinity matrix for facilitating forward and reverse chemical genetics. *Angew Chem Int Ed* 44:3559–3562.
4. Gallegos AM, et al. (2001) Gene structure, intracellular localization, and functional roles of sterol carrier protein-2. *Prog Lipid Res* 40:498–563.
5. Maeta K, Izawa S, Okazaki S, Kuge S, Inoue Y (2004) Activity of the Yap1 transcription factor in *Saccharomyces cerevisiae* is modulated by methylglyoxal, a metabolite derived from glycolysis. *Mol Cell Biol* 24:8753–8764.





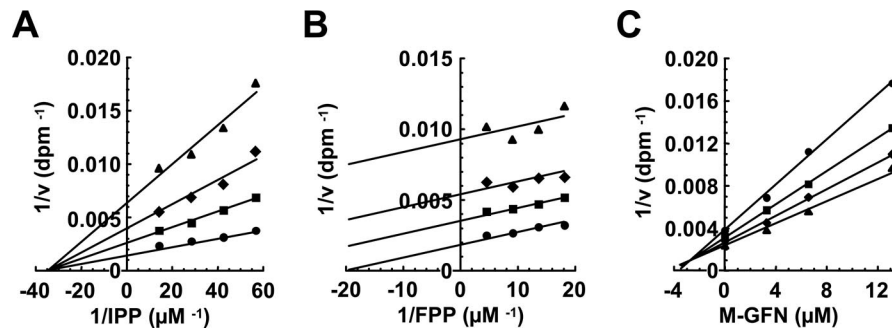

**Fig. S3.** Kinetic analysis of M-GFN against GGPP synthase. (A and B) Lineweaver-Burk plot of initial velocity vs. varying IPP concentrations (A), and vs. varying FPP concentrations (B). M-GFN concentrations are 0 (●), 3.3 (■), 6.6 (◆), and 13.2 (▲)  $\mu\text{M}$ , respectively. (C) Dixon plot of initial velocity vs. M-GFN concentration. IPP concentrations are 17.7 (●), 23.5 (■), 35.3 (◆), and 70.6 (▲) nM, respectively. M-GFN inhibited GGPP synthase in a noncompetitive manner against IPP, and the  $K_i$  value was  $2.46 \pm 0.22 \mu\text{M}$  (mean  $\pm$  SD of four independent experiments).

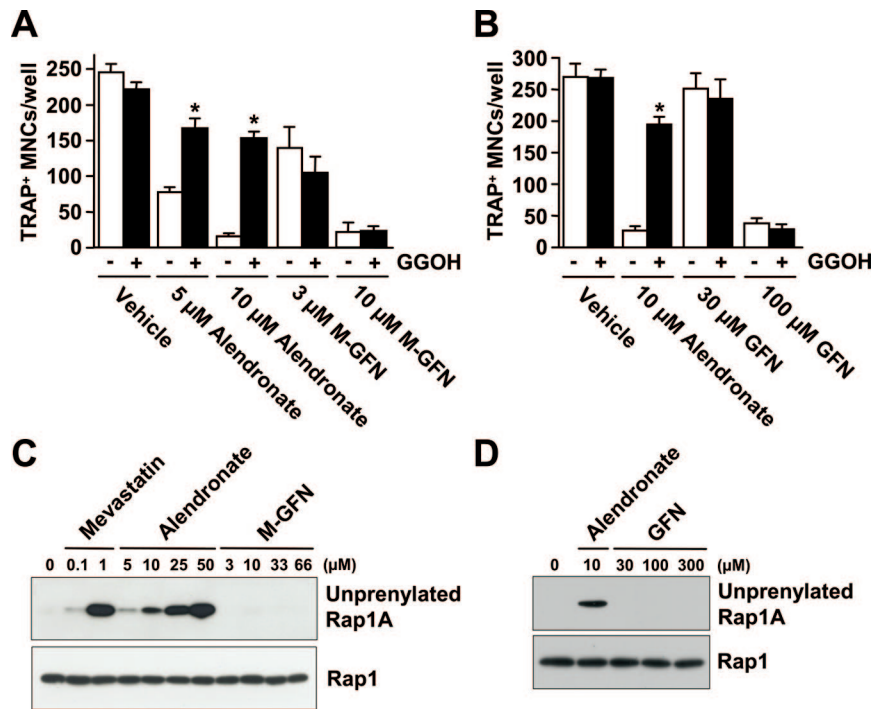

**Fig. 54.** Suppression of osteoclastogenesis by M-GFN and GFN is not involved in GGPP synthase inhibition. (A and B) Effect of GGOH on the inhibition of osteoclastogenesis by M-GFN and GFN. BMMs were treated in the presence of RANKL and M-CSF, and M-GFN, GFN, or alendronate was added to the cultures with or without 5  $\mu$ M GGOH after 36 h. After 72 h of culture, cells were fixed and stained for TRAP, and TRAP<sup>+</sup> MNCs were counted. Data are shown as the mean  $\pm$  SD ( $n = 4$ ). \*,  $P < 0.01$  vs. alendronate without GGOH, as determined by Student's  $t$  test. (C and D) Effect of M-GFN and GFN on the prenylation of Rap1A. BMMs were treated with mevastatin, alendronate, M-GFN, or GFN for 24 h. Cell lysates were immunoblotted with anti-Rap1A Ab (Top), which preferentially hybridizes to the unprenylated form of Rap1A, and anti-Rap1 Ab (Bottom).

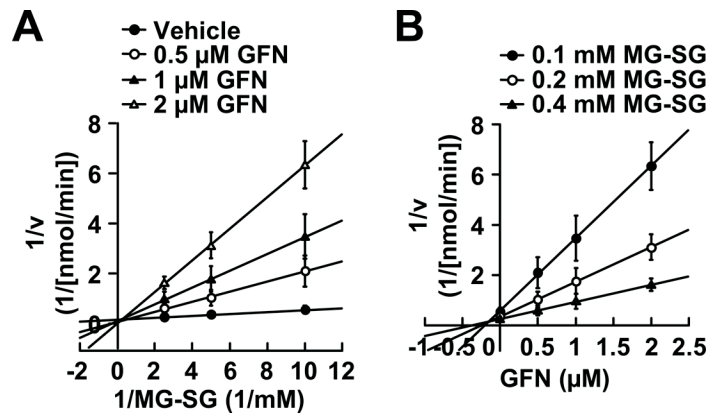

**Fig. S5.** GFN inhibits GLO1 activity in a competitive manner. (A and B) Kinetic analysis of GFN against mouse His-GLO1. (A) Lineweaver-Burk plot of initial velocity vs. varying MG-SG concentrations. (B) Dixon plot of initial velocity vs. varying GFN concentrations. Data are shown as the mean  $\pm$  SD ( $n = 3$ ).

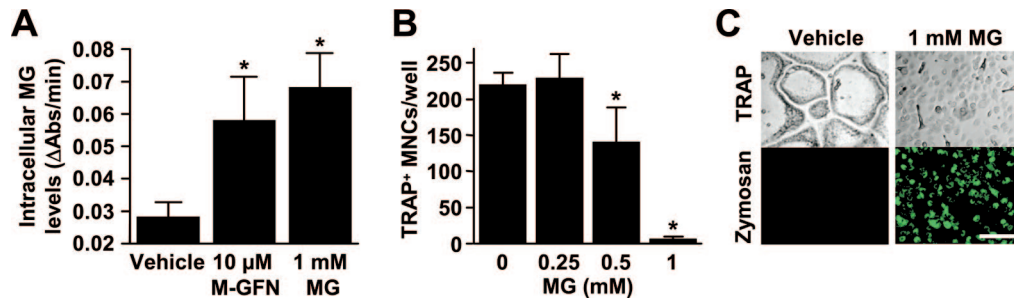

**Fig. S6.** Effect of MG on osteoclastogenesis. (A) Intracellular levels of MG in M-GFN-treated BMMs. BMMs were treated with M-GFN (10  $\mu$ M) or MG (1 mM) for 24 h. Cells were washed, resuspended in distilled water, and boiled. The supernatants were used as the source of MG. *In vitro* GLO1 assay was performed with *Saccharomyces cerevisiae* GLO1. Data are shown as the mean  $\pm$  SD ( $n = 4$ ). \*,  $P < 0.01$  vs. Vehicle. (B and C) MG suppresses osteoclastogenesis. BMMs were treated with the indicated concentrations of MG in the presence of RANKL and M-CSF for 72 h. Then, cells were treated with FL-zymosan A and further stained for TRAP (C). TRAP<sup>+</sup> MNCs were counted (B). Data are shown as the mean  $\pm$  SD ( $n = 4$ ). \*,  $P < 0.01$  vs. Vehicle. Scale bar, 150  $\mu$ m.



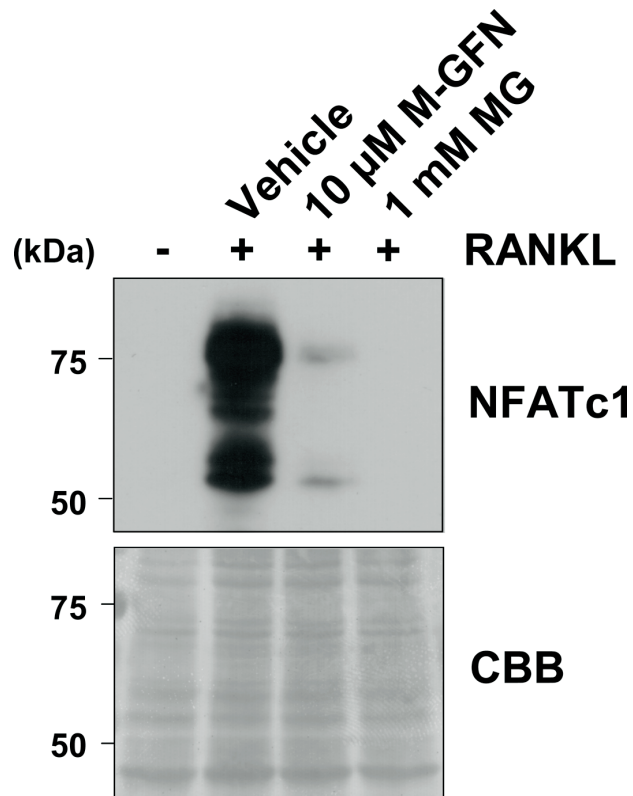

**Fig. S7.** M-GFN and MG inhibit RANKL-induced NFATc1 expression. BMMs were pretreated with M-GFN (10  $\mu$ M) or MG (1 mM) for 2 h and then treated with RANKL (50 ng/ml) for 24 h. Cell lysates were immunoblotted with anti-NFATc1 Ab (*Top*). CBB staining of the filter is shown (*Bottom*).

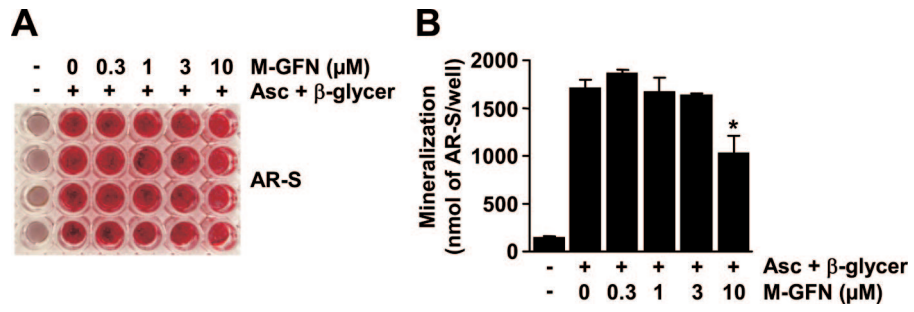

**Fig. 58.** Effect of M-GFN on the mineralization of osteoblastic cells *in vitro*. (A and B) UAMS-32 cells were treated with the indicated concentrations of M-GFN in the presence of ascorbic acid (Asc) and  $\beta$ -glycerophosphate ( $\beta$ -glycer) for 12 days. Cells were fixed and stained with AR-S (A), and AR-S concentration in samples was quantified (B). Data are shown as the mean  $\pm$  SD ( $n = 4$ ). \*,  $P < 0.01$  vs. Vehicle.

**Table S1. Crystallographic data and refinement statistics**

| Data collection                             |                              |
|---------------------------------------------|------------------------------|
| Space group                                 | P2 <sub>1</sub>              |
| Unit cell, Å                                | a = 42.0; b = 65.3; c = 66.2 |
| °                                           | a = 90; b = 101.2; g = 90    |
| Resolution, Å*                              | 50 - 1.70 (1.81 - 1.70)      |
| Completeness, %                             | 94.4 (100)                   |
| Mean I/σ                                    | 17.5 (3.2)                   |
| Redundancy                                  | 3.5 (3.7)                    |
| R <sub>merge</sub> , %                      | 6.8 (30.0)                   |
| Refinement                                  |                              |
| Resolution, Å                               | 23.4–1.70 (1.76–1.70)        |
| Reflections                                 | 36,510                       |
| R <sub>work</sub> /R <sub>free</sub> , %    | 18.5 / 21.5                  |
| No. of atoms                                |                              |
| Protein                                     | 2,845                        |
| Ligand/ion                                  | 46                           |
| Water                                       | 392                          |
| rms deviations                              |                              |
| Bonds, Å                                    | 0.012                        |
| Angles, °                                   | 1.7                          |
| Average B value (protein), Å <sup>2</sup> † | 14.4, 14.8                   |
| Average B value (M-GFN), Å <sup>2</sup> †   | 15.5, 18.1                   |

\*Values in parentheses are for the highest-resolution shells.

†Values are for molecules A and B, respectively.
